# Supplementary material for: Generation of highly integrated multiple vivid colours using a three-dimensional broadband perfect absorber
Source: PubMed Central journal article supplement (PMC6795891; doi:10.1038/s41598-019-49906-3), 2019-10-16
Supplement: 41598_2019_49906_MOESM1_ESM.pdf [file 41598_2019_49906_MOESM1_ESM.pdf]

Supplementary Information

Generation of highly integrated multiple vivid  
colors using a three-dimensional broadband  
perfect absorber

*Soo-Jung Kim<sup>1</sup>, Pil-Hoon Jung<sup>1</sup>, Wonjoong Kim<sup>1</sup>, Heon Lee<sup>1,\*</sup> and Sung-Hoon Hong<sup>2,\*</sup>*

*<sup>1</sup> Department of Materials Science and Engineering, Korea University, Anam-dong 5-1,  
Sungbuk-Ku, Seoul 136-701, Republic of Korea.*

*<sup>2</sup> ICT Materials & Components Research Laboratory, Electronic and Telecommunications  
Research Institute Gajeong-dong, Yuseong-gu, Daejeon 305-700, Republic of Korea.*

**Corresponding Authors**

E-mail: shong@etri.re.kr, heonlee@korea.ac.kr

This document provides supplementary information to “Generation of highly integrated multiple vivid colors using a three-dimensional broadband perfect absorber”. The supplementary information is 6 pages long, and contains 6 figures.

Part 1.

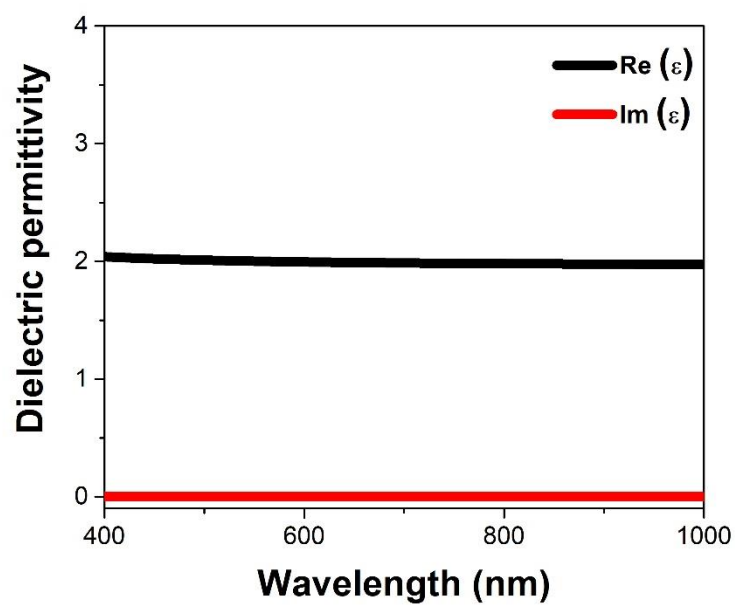

**Fig. S1.** Real part and imaginary part of dielectric constant ( $\epsilon=\epsilon'+i\epsilon''$ ) of lossless HSQ dielectric layer.

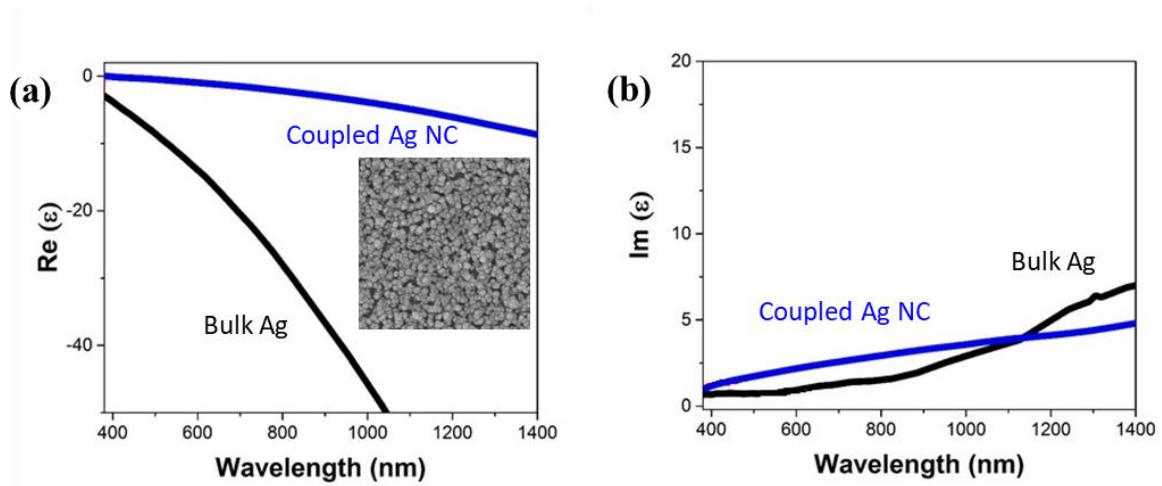

**Fig. S2.** (a) Real part and (b) Imaginary part of dielectric constant ( $\epsilon = \epsilon' + i\epsilon''$ ) of the coupled Ag NC film and bulk Ag film.

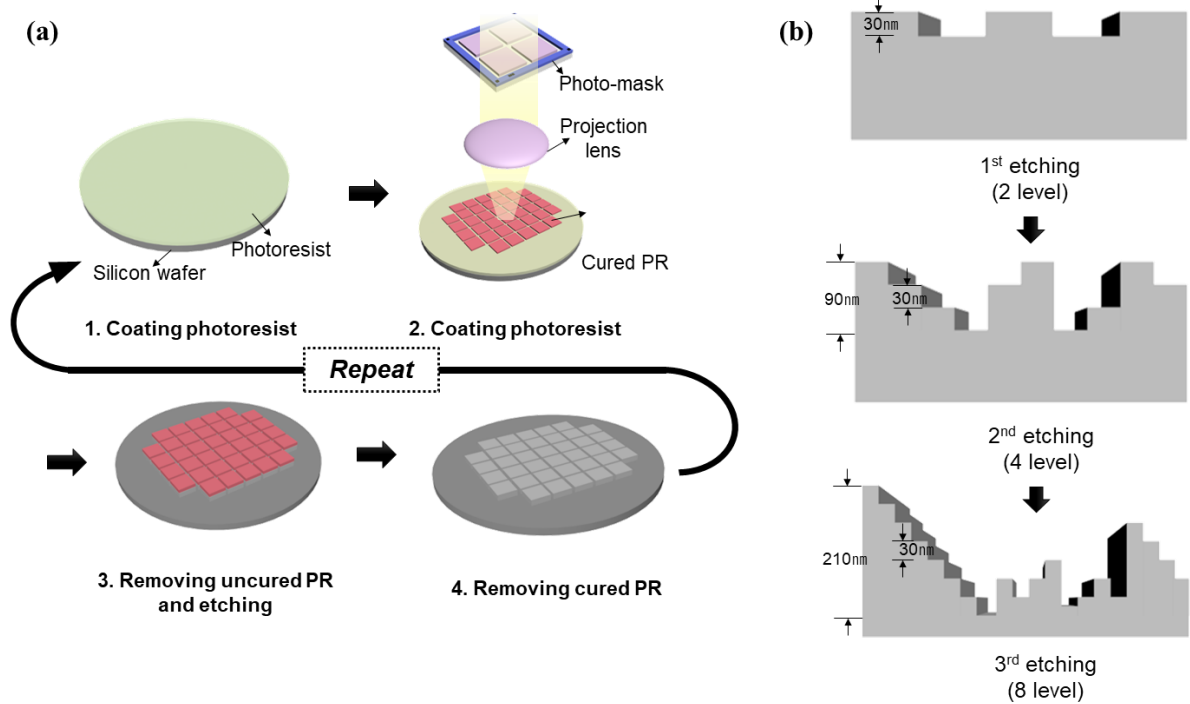

**Fig. S3.** (a) Schematic of multi-stepped silicon master stamp using photolithography and etching process with 3-steps. (b) Results from step-by-step photolithography and etching process.

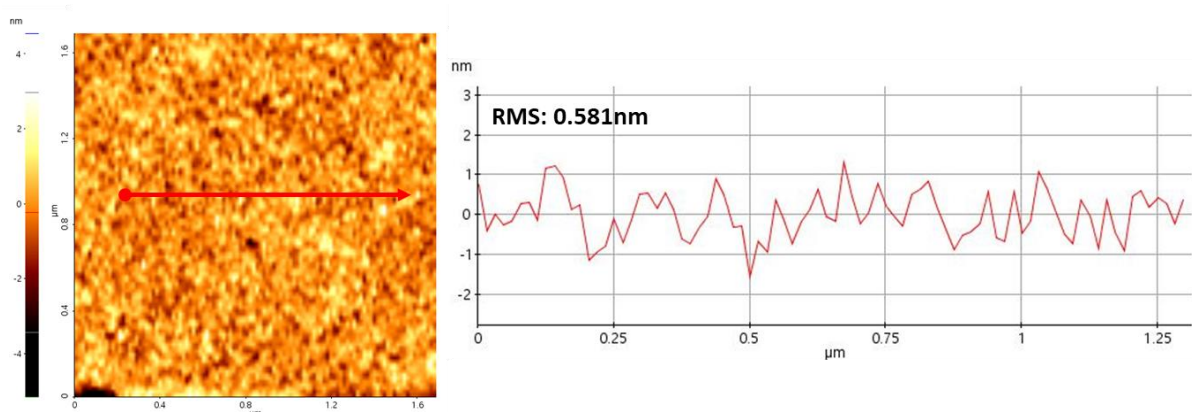

**Fig. S4.** The roughness information of the pixelated HSQ surface

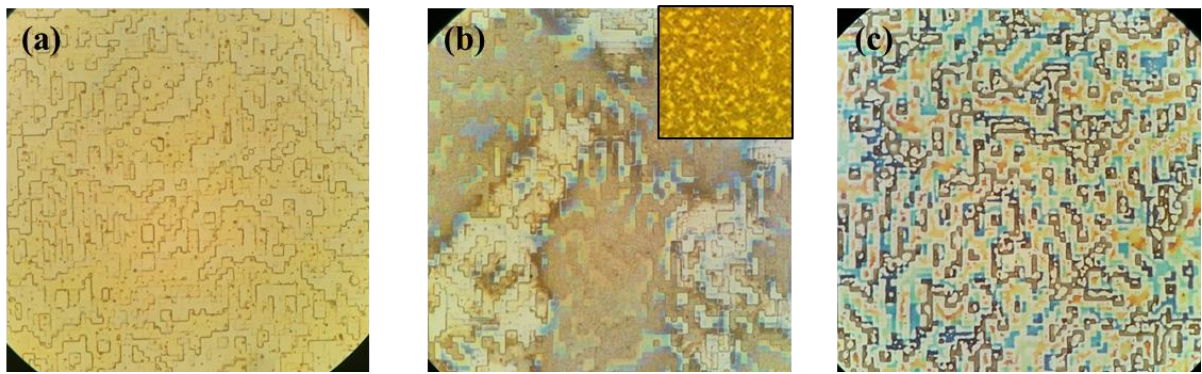

**Fig. S5.** Results of multi-absorber fabrication with various nanocrystal coating methods: (a) Dip coating, (b) Spray coating, and (c) Spin coating

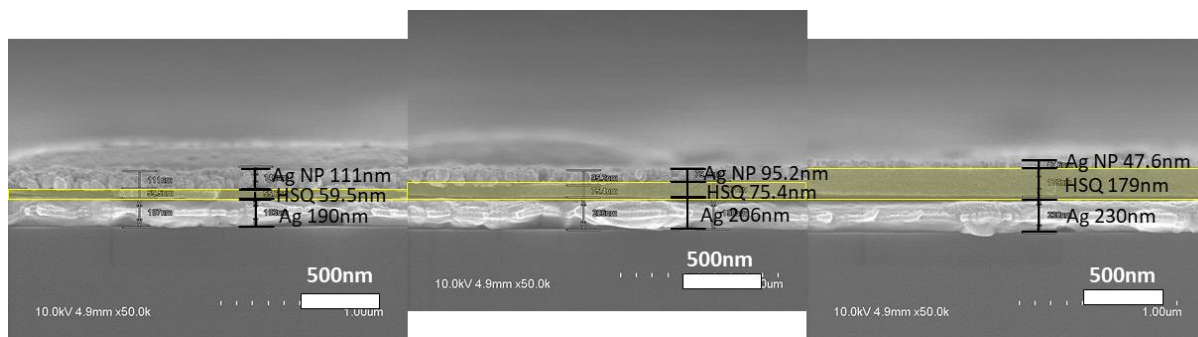

**Fig. S6.** Using spin-coating method: SEM cross section of the absorber with different Ag NC thickness due to the difference of the HSQ thickness.
